# Supplementary material
Source: Research Square preprint supplement (doi:10.21203/rs.3.rs-8910897/v1)
Supplement: Supplementary file 1 [file bfeea96541d96e10d8b01744.docx]

Electrochemical performance of Molybdenum Carbide MXene-few layer graphene hybrid electrodes for aqueous supercapacitors

*Samaneh Vaez,a,b Ahmad Bagheri,a,c,d Hossein Beydaghi,a Sebastiano Bellani,a,e Kaitlyn Prenger,f Xuyun Guo,f Jaya‐Kumar Panda,a Mengjiao Wang,b Alberto Morenghi,a Taron Makaryan,g Ali Shaygan Nia,c,d Valeria Nicolosi,f Teresa Gatti, b,h and Francesco Bonaccorso a**

a BeDimensional S.p.A., Lungotorrente Secca 30R, 16163 Genoa, Italy

b Department of Applied Science and Technology (DISAT), Politecnico di Torino, 10129 Torino, Italy

c Max Planck Institute of Microstructure Physics, Weinberg 2, 06120 Halle, Germany

d Center for Advancing Electronics Dresden (cfaed) and Faculty of Chemistry and Food Chemistry, Technische Universität Dresden, 01062 Dresden, Germany

e Antares Electrolysis S.r.l., Piazza della Vittoria 14/19, 16121 Genova, Italy

f School of Chemistry Centre for Research on Adaptive Nanostructures and Nanodevices (CRANN) and Advanced Materials Bio-Engineering Research Centre (AMBER) Trinity College Dublin, Dublin D02PN40, Ireland

g  Skeleton Technologies GmbH, Göhrenzer Straße 1, 04420 Markranstädt, Germany

h Center for Materials Research, Justus Liebig University, Heinrich-Buff-Ring 17, 35392 Giessen, Germany

*Corresponding author: f.bonaccorso@bedimensional.it

**Contents**

[**Figure S1.** CV curves of Mo2CCl2/FLG electrodes in various electrolytes (3 M H2SO4, 1 M Li2SO4, 1 M Na2SO4, 0.6 M K2SO4). 3](#_Toc212412719)

[**Figure S2.** GCD profiles of Mo2CCl2/FLG electrodes in different electrolytes at various current densities. 4](#_Toc212412720)

[**Table S1.** Comparison of electrochemical performance of Mo2C-based electrodes in this work with previous reports. 5](#_Toc212412721)

[**Figure S3.** Capacity retention after 12000 GCD cycles at 5 A/g in different electrolytes. 6](#_Toc212412722)

[**Figures S4–S5.** Electrochemical performance of Mo2CCl2/FLG in NaCl and NaNO₃ electrolytes. 7](#_Toc212412723)

[**Figure S6.** XRD and Raman spectra of Mo2CCl2/FLG electrodes before and after cycling. 8](#_Toc212412724)

[**Figures S7–S9.** Electrochemical behavior of Mo2CCl2/FLG and CG/FLG in NaNO₃, NaCl, and H2SO4 electrolytes.](#_Toc212412725) 8-9

[**Figure S10.** Nyquist plots of Mo2CCl2/FLG // CG/FLG asymmetric supercapacitors (ASCs).](#_Toc212412726) 10

[**Figures S11–S13.** Charge-storage mechanism analysis for NaNO₃, NaCl, and H2SO4 systems. 11-13](#_Toc212412727)

**Electrochemical characterization and calculations**

The electrochemical performance of the supercapacitors was evaluated using cyclic voltammetry (CV), galvanostatic charge/discharge (GCD), and electrochemical impedance spectroscopy (EIS). All tests were carried out at room temperature (25 °C) with a potentiostat/galvanostat (VMP3, Biologic). Cyclic voltammetry measurements were carried out at varying scan rates ranging from 5 to 50 mV/s. Galvanostatic charge/discharge tests were performed at different specific current values, between 1 and 20 A/g. The effective gravimetric capacitance (Cg, in F/g) of the electrodes was derived from the CV curves using equation (S1).

Cg (F/g) = (S1)

Here, ∫*idV* refers to the voltametric charge obtained by integrating the area under the CV curve. *v* denotes the potential scan rate (V/s), Δ*V* is the potential window (V), while *m* represents the mass loading of the electrode.

The gravimetric capacitance (F/g) of the asymmetric supercapacitors (ASCs) were calculated from GCD curves using the equation (S2):

Cg (F/g)(S2)

In which td is the discharge time of the GCD profile, m is the total mass of active materials in both electrodes, i is the charging/discharging current.

The energy density (*Es*, in Wh/kg) and power density (*Ps*, in W/kg) of the devices were determined using the following equations:

Es (Wh/kg) = (S3)

Ps (W/kg) = (S4)

Here, ∫*Vdt* represents the area under the galvanostatic discharge curve, *id*is the specific current (A/g), *m* denotes the combined mass of the active materials from both electrodes (excluding the mass of the current collectors), and *Ed* refers to the energy delivered during discharge (*Es*).

***Figure S1****. Electrochemical characterization of the investigated Mo2CCl2/FLG electrodes.* *CV curves measured for* *a) Mo2CCl2/FLG-3 M H2SO4, b) Mo2CCl2/FLG*–*1 M Li2SO4, c) Mo2CCl2/FLG*–*1 M Na2SO4, and d) Mo2CCl2/FLG*–*0.6 M K2SO4, at potential scan rates ranging from 5 to 50 mV/s.*

***Figure S2****. Electrochemical characterization of the investigated Mo2CCl2/FLG electrodes. GCD profiles measured for a) Mo2CCl2/FLG*–*3 M H2SO4, b) Mo2CCl2/FLG*–*1 M Li2SO4, c) Mo2CCl2/FLG*–*1 M Na2SO4, and d) Mo2CCl2/FLG*–*0.6 M K2SO4, at specific currents ranging from 1 to 20 A/g.*

**Table S1**. Comparison of electrochemical performances of Mo2C*-*based electrode in this work with previous literature reports.

| Electrode Material | Scan Rate / Current Density | Specific Capacitance (F/g) | Electrolyte | Capacitance Retention / Cycle Number | Ref. |
| --- | --- | --- | --- | --- | --- |
| Mo2CTx | 2 mV/s | 196 | 1 M H2SO4 | 100% / 10,000 | 1 |
| Ti2C MXene | 2 mV/s | 382 | 1 M H2SO4 | 80% / 1,000 | 2 |
|  |  | 104 | 1 M LiCl | 100% / 1,000 |  |
|  |  | 99 | 1 M NaOH | 100% / 1,000 |  |
| Ti3C2Tx | 2 mV/s | 245 | 1 M H2SO4 | 100% / 10,000 | 3 |
| N-Mo2C@MoO₃₋ₓ | 100 mV/s | 174.5 | 1 M Na2SO4 | – / 5,000 | 4 |
| Mo2CTx | 2 mV/s | 154.26 | 1 M H2SO4 | 86% / 1,000 | 5 |
|  |  | 51.33 | 1 M Na2SO4 | – |  |
|  |  | 13.21 | 1 M NaOH | – |  |
| Mo1.33C | 2 mV/s | 339 | 1 M H2SO4 | 84% / 10,000 | 6 |
| MnO2–Mo2C NF | 50 mV/s | 302 | 1 M Na2SO4/ EMIMBF4 / AN | – / 5,000 | 7 |
| 3DHPC-Mo2C | 20 mV/s | 206 | 6 M KOH | – / 7,000 | 8 |
| Mo2CTx | 0.3 A/g | 11.27 | 1 M KOH | 89.9% / 5,000 | 9 |
|  |  | 18.97 | 1 M MgSO4 | 96% / 5,000 |  |
|  |  | 79.14 | 1 M H2SO4 | 98% / 5,000 |  |
| Mo2C@CNT | 10 mV/s | 367 | 1 M KOH | – / 5,000 | 10 |
| OMC/Mo2C /AC | 100 mV/s | 299.4 | 6 M KOH | – / 5,000 | 11 |
| Mo2CCl2/FLG | 50 mV/s | 136.3 | 3 M H2SO4 | 89% / 12,000 | This work |
|  |  | 42.85 | 1 M Li2SO4 | 90% / 12,000 |  |
|  |  | 38.75 | 1 M Na2SO4 | 93% / 12,000 |  |
|  |  | 32.12 | 0.6 M K2SO4 | 90% / 12,000 |  |
|  |  | 35.5 | 2 M NaCl | 80% / 12,000 |  |
|  |  | 45.62 | 8 m NaNO₃ | 82% / 12,000 |  |

*Figure* ***S3****. Cg retention after 12000 GCD cycles at 5 A/g measured for a) Mo2CCl2/FLG*–*3 M H2SO4, b) Mo2CCl2/FLG*–*1 M Li2SO4, c) Mo2CCl2/FLG*–*1 M Na2SO4, and d) Mo2CCl2/FLG*–*0.6 M K2SO4.*

***Figure S4****. CV curves measured for a) Mo2CCl2/FLG*–*2 M NaCl, b) Mo2CCl2/FLG*–*8 m NaNO3, GCD profiles measured for c) Mo2CCl2/FLG*–*2 M NaCl, d) Mo2CCl2/FLG*–*8 m NaNO3.*

***Figure******S5****. Cg retention after 12000 GCD cycles at 5 A/g measured for a) Mo2CCl2 /FLG*–*2 M NaCl, b) Mo2CCl2 /FLG*–*8 m NaNO3.*

***Figure******S6****. a) XRD patterns measured for pristine Mo2CCl2, and Mo2CCl2/FLG electrodes in 8 m NaNO3 and* 3 M H2SO4 after 12000 GCD cycles at 5 A/g. *b) Raman spectra measured for pristine Mo2CCl2 and Mo2CCl2/FLG electrodes in 8 m NaNO3 and* 3 M H2SO4 *before and after 12000 GCD cycles at 5 A/g.*

***Figure S7****. Electrochemical characterization of the investigated CG/FLG*–*8 m NaNO3 electrode a) CV, b) GCD, c) Cg at different specific current. For the Mo2CCl2/FLG*–*8 m NaNO3 electrode d) CV, e) GCD, f) Cg at different specific current.*

***Figure S8****. Electrochemical characterization of the investigated CG/FLG*–*2 M NaCl electrode a) CV, b) GCD, c) Cg at different specific current. For the Mo2CCl2/FLG*–*2 M NaCl electrode d) CV, e) GCD, f) Cg at different specific current.*

***Figure S9****. Electrochemical characterization of the investigated CG/FLG*–3 M H2SO4 electrode *a) CV, b) GCD, c) Cg at different specific current. For the Mo2CCl2/FLG* –3 M H2SO4 electrode *d) CV, e) GCD, f) Cg at different specific current from 1 to 20 A/g.*

***Figure S10.*** *Nyquist plots measured for Mo2CCl2/FLG // CG/FLG ASCs.*

***Figure S11****. Charge-storage mechanism of Mo2CCl2/FLG // CG/FLG*–*8 m NaNO3. a) b-values as a function of the potential. b) Linear relation of i(V)/ν0.5 vs. ν0.5 at various voltages. c) Percentage contribution of capacitive and diffusion-controlled processes at -0.3 V (vs. Ag/AgCl). d) Capacitive and diffusion-controlled currents determining the overall charge storage at 50 mV/s.*

***Figure S12****. Charge-storage mechanism of Mo2CCl2/FLG // CG/FLG*–*2 M NaCl. a) Corresponding b-values as a function of the potential. b) The linear relation of i(V)/ν0.5 vs. ν0.5 at various voltages. c) Percentage contribution of capacitive and diffusion-controlled processes at -0.3 V (vs. Ag/AgCl). d) Capacitive and diffusion-controlled currents determining the overall charge storage at 50 mV/s.*

***Figure S13****. Charge-storage mechanism of Mo2CCl2/FLG // CG/FLG*–3 M H2SO4*. a) Corresponding b-values as a function of the potential. b) The linear relation of i(V)/ν0.5 vs. ν0.5 at various voltages. c) Percentage contribution of capacitive and diffusion-controlled processes at -0.2 V (vs. Ag/AgCl). d) Capacitive and diffusion-controlled currents determining the overall charge storage at 50 mV/s.*

**References**

1 Halim, J. *et al.* Synthesis and characterization of 2D molybdenum carbide (MXene). *Advanced Functional Materials* **26**, 3118-3127 (2016).

2 Guan, Y. *et al.* Flexible Ti2C MXene film: Synthesis, electrochemical performance and capacitance behavior. *Chemical Engineering Journal* **433**, 133582 (2022).

3 Ghidiu, M., Lukatskaya, M. R., Zhao, M.-Q., Gogotsi, Y. & Barsoum, M. W. in *MXenes* 379-399 (Jenny Stanford Publishing, 2023).

4 Gurusamy, L., Karuppasamy, L., Anandan, S., Liu, C.-H. & Wu, J. J. Defective engineering of heterostructured N-Mo2C@ MoO3-x electrode materials for the dual function of electrochemical sensing and supercapacitor applications. *Electrochimica Acta* **408**, 139964 (2022).

5 Ji, Z. *et al.* Flexible and freestanding Mo2CTx film electrode with high capacitive properties in aqueous electrolytes. *Electrochimica Acta* **502**, 144841 (2024).

6 Tao, Q. *et al.* Two-dimensional Mo1. 33C MXene with divacancy ordering prepared from parent 3D laminate with in-plane chemical ordering. *Nature communications* **8**, 14949 (2017).

7 Shi, M. *et al.* Highly conductive Mo2C nanofibers encapsulated in ultrathin MnO2 nanosheets as a self-supported electrode for high-performance capacitive energy storage. *ACS applied materials & interfaces* **8**, 32460-32467 (2016).

8 Lu, C. *et al.* Ultrafine Mo2C nanoparticles supported on three-dimensional hierarchical porous carbon architecture toward electrochemical energy storage applications. *Journal of Energy Storage* **33**, 101855 (2021).

9 He, H. *et al.* Effect of electrolyte on supercapacitor performance of two-dimensional molybdenum carbide (Mo2CTx) MXene prepared by hydrothermal etching. *Applied Surface Science* **568**, 150971 (2021).

10 Hussain, S. *et al.* Hybrid design using carbon nanotubes decorated with Mo2C and W2C nanoparticles for supercapacitors and hydrogen evolution reactions. *ACS Sustainable Chemistry & Engineering* **8**, 12248-12259 (2020).

11 Abdolahi, B., Gholivand, M. B., Shamsipur, M. & Amiri, M. Ordered mesoporous carbon/molybdenum carbide nanocomposite with high electrochemical performance asymmetric supercapacitor. *Journal of Alloys and Compounds* **905**, 164185 (2022).
